# Supplementary material for: Effect of Tempeh on Gut Microbiota and Anti-Stress Activity in Zebrafish
Source: MDPI journal article supplement (doi:10.3390/ijms222312660), 2021-11-23
Supplement: s1 [file s1]

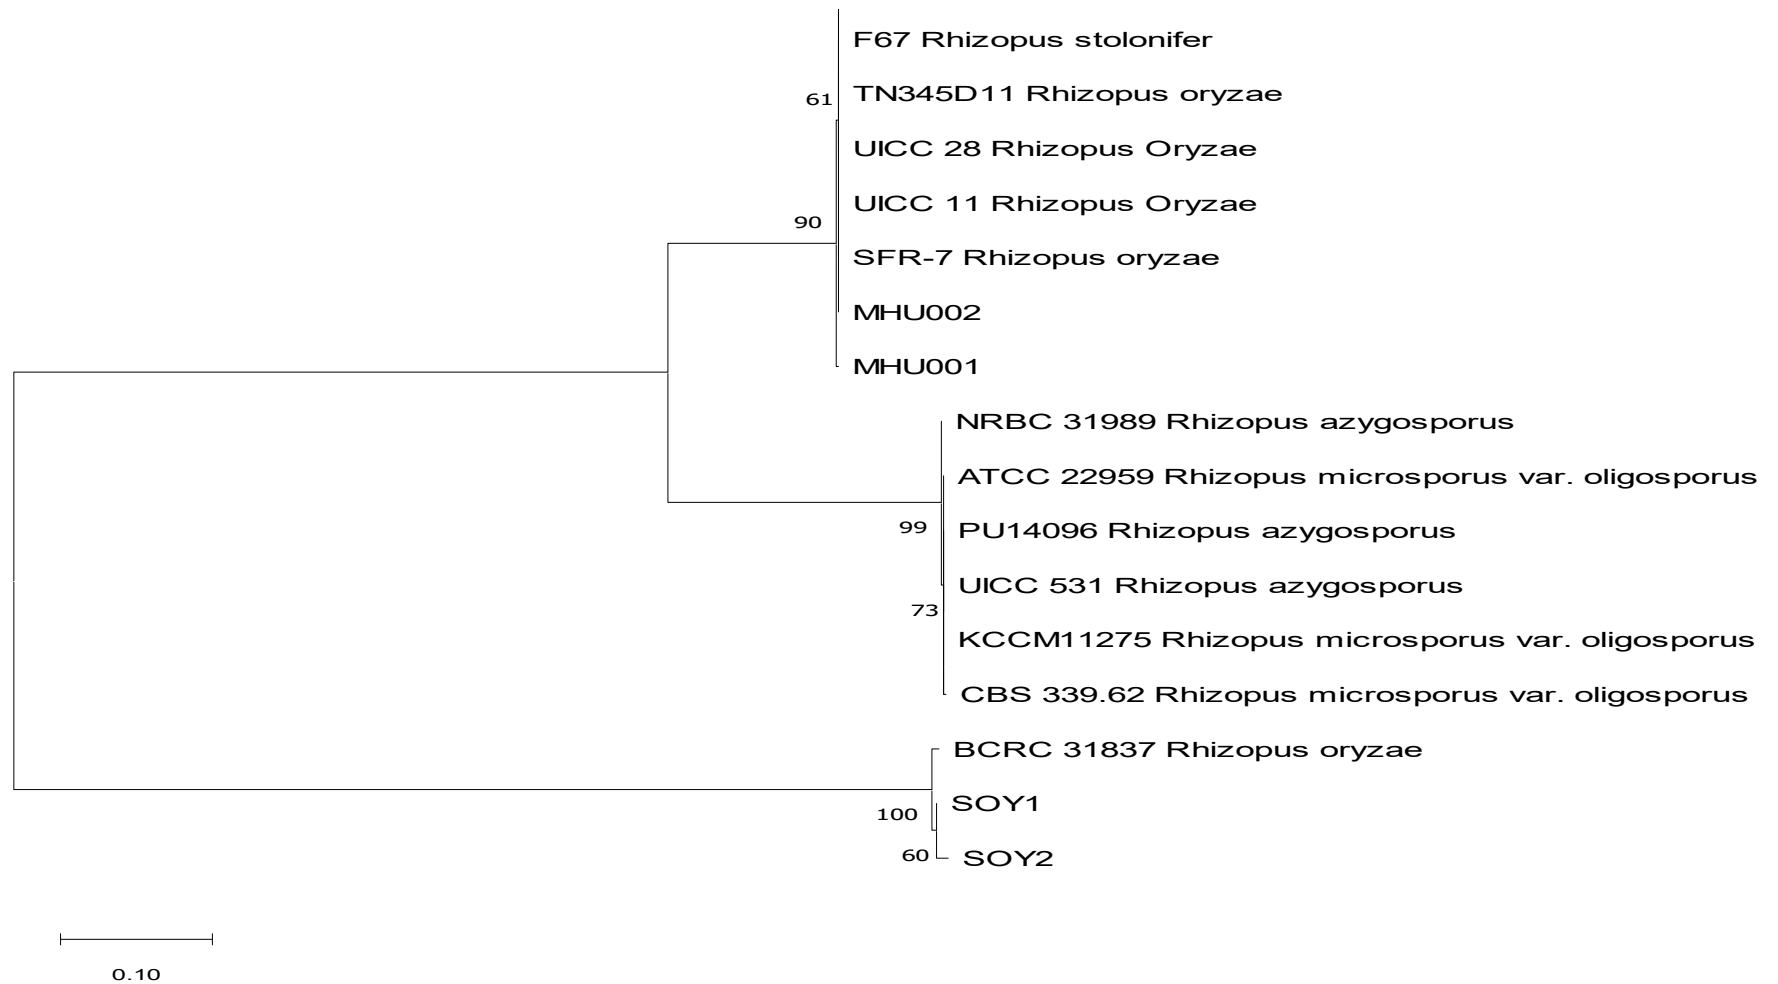

**Figure S1.** Phylogenetic tree using internal transcribed spacer (ITS) sequences showing closest known relatives of *Rhizopus oryzae*. DNA sequences from the NCBI nucleotide database were aligned using ClustalW, and a phylogenetic tree was constructed using the neighbor-joining (ML) method implemented in MEGA X. The numbers at the branch points are bootstrap values for parsimony-based analysis.
